# Supplementary material for: Sponge-like Scaffolds for Colorectal Cancer 3D Models: Substrate-Driven Difference in Micro-Tumors Morphology
Source: MDPI journal article supplement (doi:10.3390/biomimetics7020056), 2022-05-05
Supplement: s1 [file s1]

# Sponge-like scaffolds for colorectal cancer 3D models: substrate driven difference in micro tumors morphology

Andrey Boroda <sup>1</sup>, Yuliya Privar <sup>2</sup>, Mariya Maiorova <sup>1</sup>, Anna Skatova <sup>2</sup>, and Svetlana Bratskaya <sup>2,\*</sup>

<sup>1</sup> A.V. Zhirmunsky National Scientific Center of Marine Biology, Far Eastern Branch of Russian Academy of Sciences, 17, Palchevskogo street, 690041 Vladivostok, Russia; [borodandy@gmail.com](mailto:borodandy@gmail.com)

<sup>2</sup> Institute of Chemistry Far Eastern Branch of the Russian Academy of Sciences, 159, prosp.100-letiya Vladivostoka, 690022 Vladivostok, Russia; [sbratska@ich.dvo.ru](mailto:sbratska@ich.dvo.ru)

\* Correspondence: [sbratska@ich.dvo.ru](mailto:sbratska@ich.dvo.ru) (S.B.)

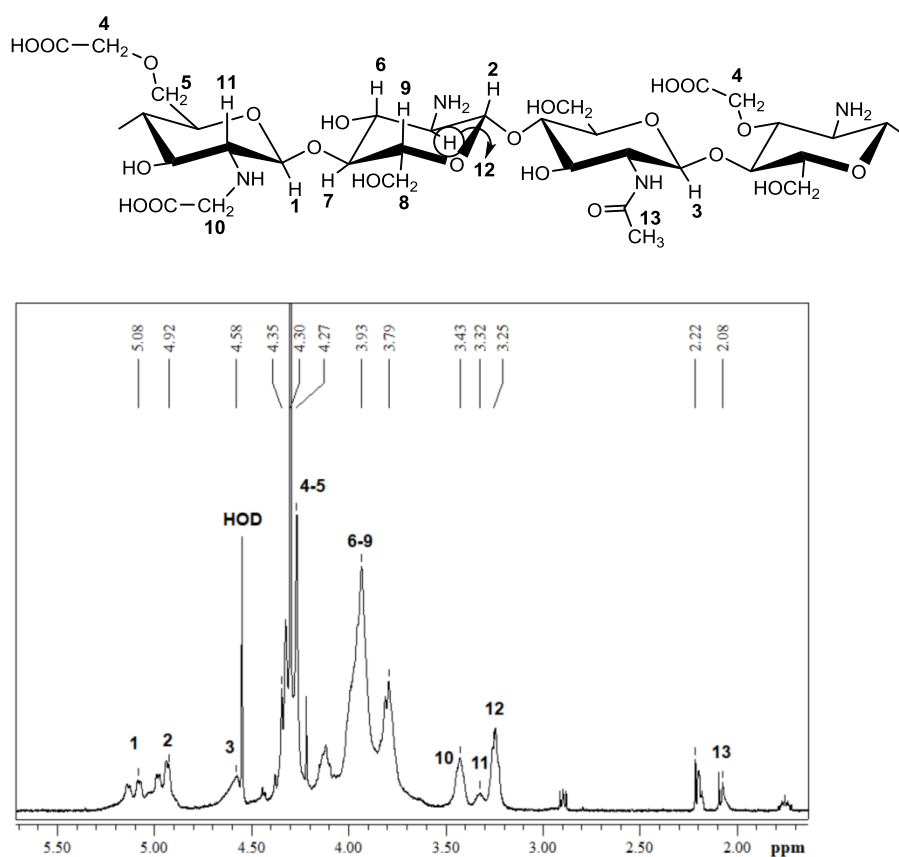

Figure S1. 400 MHz <sup>1</sup>H NMR spectra of N,O-(carboxymethyl)chitosan

**Table S1.** Monomer composition of carboxymethyl chitosan (CMC)

| DA <sup>1</sup> | DS <sub>tot</sub> <sup>2</sup> | N-DS <sup>3</sup> | O-DS <sup>4</sup> | Monomer composition |      |                 |                     |
|-----------------|--------------------------------|-------------------|-------------------|---------------------|------|-----------------|---------------------|
|                 |                                |                   |                   | NH <sub>2</sub>     | NHR  | NR <sub>2</sub> | NHCOCH <sub>3</sub> |
| 0.25            | 1.49                           | 0.29              | 1.20              | 0.46                | 0.29 | 0               | 0.25                |

<sup>1</sup> - Degree of acetylation, <sup>2</sup> - Degree of carboxyalkyl substitution (total), <sup>3</sup> - Degree of N-carboxyalkyl substitution,

<sup>4</sup> - Degree of O-carboxyalkyl substitution

**Table S2.** Calculations of reagents quantities for chitosan cryogels fabrication

Chitosan molecular weight - 163 g/mol

BDDGE molecular weight - 202 g/mol

| BDDGE:chitosan molar ratio | 3% chitosan solution, g | 60% BDDGE solution, g |
|----------------------------|-------------------------|-----------------------|
| 2:1                        | 5                       | 0.62                  |
| 1:1                        | 5                       | 0.31                  |
| 1:2                        | 5                       | 0.155                 |
| 1:4                        | 5                       | 0.0775                |

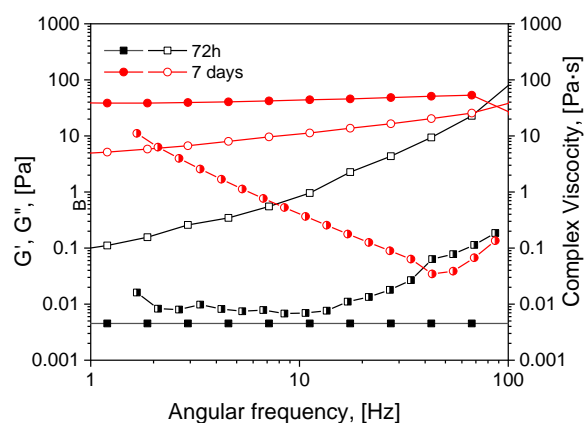**(a)**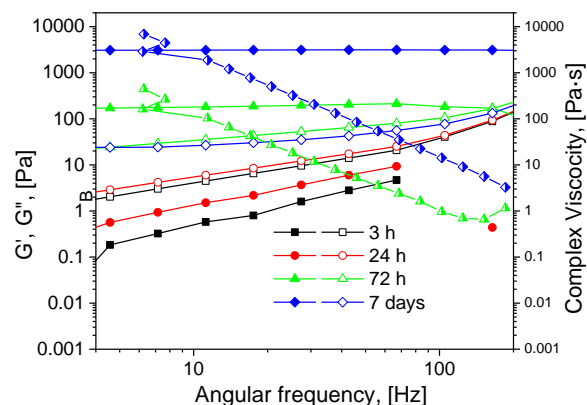**(b)**

**Figure S2.** Evolution of mechanical spectra of 3% CMC (a) and chitosan (b) solutions after addition of cross-linker BDDGE: filled symbols – storage modulus ( $G'$ ), open symbols – loss modulus ( $G''$ ), half-filled – complex viscosity

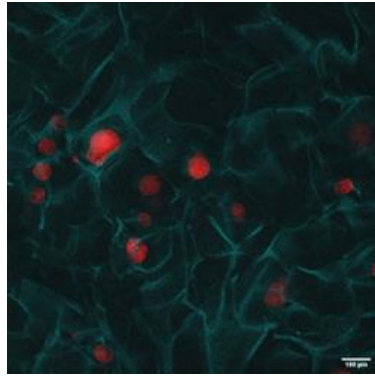

(a)

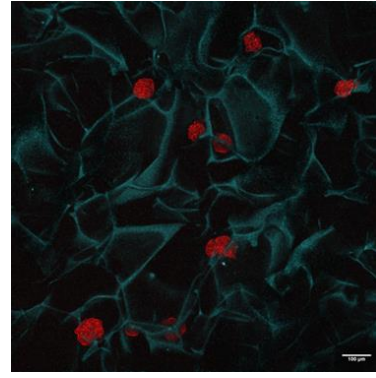

(b)

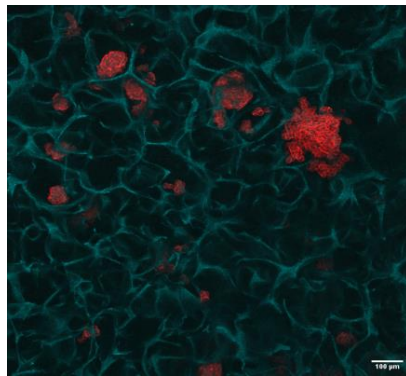

(c)

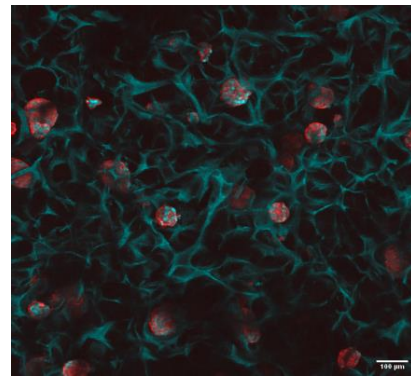

(d)

**Figure S3.** Confocal laser scanning microscopy (CLSM) images of CMC- cryogels with HCT 116 cells after 7 days (a), and 14 days (b) of cultivation (BDDGE:polymer ratio of 1:2) and after 3 days (c), and 7 days (d) of cultivation (BDDGE:polymer ratio of 2:1), scale bar – 100  $\mu\text{m}$ .
